# Supplementary material for: Binary pentagonal auxetic materials for photocatalysis and energy storage with outstanding performances
Source: Royal Society of Chemistry journal article supplement (doi:10.1039/d1nr08368f), 2022-01-01
Supplement: d1nr08368f1.pdf [file d1nr08368f1.pdf]

*Supporting Information for*

**Binary pentagonal auxetic materials for photocatalysis and  
energy storage with outstanding performances**

Zishuang Cheng,<sup>a,b</sup> Xiaoming Zhang,<sup>a,b,c\*</sup> Hui Zhang,<sup>a,b</sup> Heyan Liu,<sup>a,b,c</sup> Xiao Yu,<sup>a,b</sup>  
Xuefang Dai,<sup>a,b</sup> Guodong Liu,<sup>a,b\*</sup> and Guifeng Chen<sup>a,b\*</sup>

<sup>a</sup>State Key Laboratory of Reliability and Intelligence of Electrical Equipment, Hebei University of Technology, Tianjin 300130, China.

<sup>b</sup>School of Materials Science and Engineering, Hebei University of Technology, Tianjin 300130, China.

<sup>c</sup>State Key Laboratory of Baiyunobo Rare Earth Resource Researches and Comprehensive Utilization, Baotou Research Institute of Rare Earths, Baotou 014030, China.

\*Corresponding authors:

Xiaoming Zhang, zhangxiaoming87@hebut.edu.cn;

Guodong Liu, gdliu1978@126.com;

Guifeng Chen, cgfchen@hebut.edu.cn.

## Contents of Supporting Information

1. Computational details for the absorption coefficient and the carrier mobility.
2. Calculated lattice parameters for Penta-C<sub>n</sub>X<sub>6-n</sub> (Table S1).
3. Phonon spectra of Penta-C<sub>n</sub>X<sub>6-n</sub> (Figure S1).
4. Evolutions of total potential energy of Penta-C<sub>n</sub>X<sub>6-n</sub> with respect to simulation time at the temperature of 300 K, and the top and side views of snapshots after 5000 fs (Figure S2).
5. Elastic energies of stable Penta-C<sub>n</sub>X<sub>6-n</sub> under uniaxial, biaxial and shear in-plane strains, respectively (Figure S3).
6. Formation enthalpies of stable Penta-C<sub>n</sub>X<sub>6-n</sub> compared with their allotropes in other works (Figure S4).
7. Stress-strain relationships of uniaxial (x and y directions) and biaxial (xy direction) in-plane strains for Penta-C<sub>2</sub>B<sub>4</sub> (Figure S5).
8. Evolutions of the local skeleton configurations of Penta-C<sub>4</sub>P<sub>2</sub>, Penta-C<sub>2</sub>Al<sub>4</sub> and Penta-C<sub>2</sub>Ga<sub>4</sub> under the uniaxial strain along x direction (Figure S6).
9. Evolution of the total energy of Penta-C<sub>4</sub>Si<sub>2</sub> and Penta-C<sub>2</sub>P<sub>4</sub> obtained from 5000 fs AIMD simulations in a 300 K water environment (Figure S7).
10. The possible adsorption sites on Penta-C<sub>4</sub>P<sub>2</sub> and Penta-C<sub>5</sub>P (Figure S8).

The absorption coefficient:

The optical properties usually rely on the complex dielectric function (frequency) for characterization, which is defined as:

$$\varepsilon(\omega) = \varepsilon_1(\omega) + i\varepsilon_2(\omega) \quad (1)$$

therein  $\varepsilon_1(\omega)$  and  $\varepsilon_2(\omega)$  represent the real and imaginary parts, respectively. The imaginary part  $[\varepsilon_2(\omega)]$  of the dielectric function can be expressed as [1]:

$$\varepsilon_2(\omega) = \frac{4\pi e^2}{m^2 \omega^2} \sum_{i,f} \int \frac{2d^3k}{(2\pi)^3} |\langle ik|P|fk \rangle|^2 F_i^k (1 - F_f^k) \delta(E_f^k - E_i^k - E) \quad (2)$$

where  $\omega$ ,  $E$  and  $F$  are incident photon frequency, incident photon energy and the Fermi function, respectively.  $P$ ,  $|ik\rangle$  and  $|fk\rangle$  represent the transition matrix, the CB state and VB state, respectively. Besides, based on the Kramers-Kronig transformation [2], the real part  $[\varepsilon_1(\omega)]$  can be described by the following equation:

$$\varepsilon_1(\omega) = 1 + \left(\frac{2}{\pi}\right)p \int_0^\infty d\omega' \frac{(\omega')^2 \varepsilon_2(\omega')}{(\omega')^2 - (\omega)^2} \quad (3)$$

here  $p$  is the integral principal value. More importantly, the absorption coefficient  $[\alpha(\omega)]$  can be calculated by [3]:

$$\alpha(\omega) = \frac{\sqrt{2\omega}}{c} [\sqrt{\varepsilon_1^2(\omega) + \varepsilon_2^2(\omega)} - \varepsilon_1(\omega)]^{1/2} \quad (4)$$

where  $c$  is the speed of light in vacuum.

The carrier mobility:

The carrier effective mass ( $m^*$ ) can be obtained by fitting the electronic band dispersion as the following equation [4]:

$$\frac{1}{m^*} = \frac{1}{\hbar^2} \frac{\partial^2 E(k)}{\partial k^2} \quad (5)$$

where  $\hbar$  is the reduced Plank constant,  $k$  represents the wave vector and  $E(k)$  represents the carrier energy. Based on the deformation potential theory, the carrier mobility can be assessed by the following formula [5]:

$$\mu = \frac{e\hbar^3 C_{2D}}{k_B T m_e^* m_d E_d^2} \quad (6)$$

where  $k_B$  is the Boltzmann constant and  $T$  is the temperature (300 K).  $m_e^*$  is the effective mass of electrons or holes along the transport direction.  $m_d$  is the average effective mass defined using the expression  $m_d = \sqrt{m_x^* m_y^*}$  where  $m_x^*$  and  $m_y^*$  are along the  $x$  and  $y$  directions, respectively.  $E_d$  represents the deformation potential constant, which is defined as  $E_d = \frac{\partial E_{edge}}{\partial \delta}$  where  $E_{edge}$  represents the shift of the band edge position with respect to the uniaxial strain  $\delta$ .  $C_{2D}$  is the elastic modulus, which can be determined by  $C_{2D} = \frac{1}{S_0} \frac{\partial^2 E}{\partial \delta^2}$ , where  $E$  is the total energy of monolayer after deformation and  $S_0$  is the lattice area of monolayer under equilibrium.

- [1] M. Naseri and J. Jalilian. Electronic and optical investigations of Be<sub>2</sub>C monolayer: Under stress and strain conditions, *Mater. Res. Bull.* 88 (2017) 49-55.
- [2] A.B. Kuzmenko. Kramers–Kronig constrained variational analysis of optical spectra, *Rev. Sci. Instrum.* 76 (2005) 083108.
- [3] S. Saha, T.P. Sinha and A. Mookerjee. Electronic structure, chemical bonding, and optical properties of paraelectric BaTiO<sub>3</sub>, *Phys. Rev. B* 62 (2000) 8828.
- [4] Q. Zhang, X. Wang and S.L. Yang.  $\delta$ -SnS: An Emerging Bidirectional Auxetic Direct Semiconductor with Desirable Carrier Mobility and High-Performance Catalytic Behavior toward the Water-Splitting Reaction, *ACS Appl. Mater. Interfaces* 13 (2021) 31934-31946.
- [5] J. Bardeen and W. Shockley. Deformation potentials and mobilities in non-polar crystals, *Phys. Rev.* 80 (1950) 72.

Table S1 Calculated lattice parameters for Penta-C<sub>n</sub>X<sub>6-n</sub>:  $a$  is lattice constant,  $d$  is the thickness in vertical direction,  $d_{C-X}$  is the bond length of C-X,  $\Delta H$  is the formation enthalpy of Penta-C<sub>n</sub>X<sub>6-n</sub>.

| Materials (Penta-)             | $a$ (Å) | $d$ (Å) | $d_{C-X}$ (Å) | $\Delta H$ (eV/atom) |
|--------------------------------|---------|---------|---------------|----------------------|
| C <sub>5</sub> B               | 3.771   | 1.109   | 1.606         | 1.014                |
| C <sub>4</sub> B <sub>2</sub>  | 4.004   | 0.807   | 1.643         | 1.074                |
| C <sub>2</sub> B <sub>4</sub>  | 3.934   | 1.073   | 1.582         | 0.610                |
| CB <sub>5</sub>                | 4.106   | 0.894   | 1.559         | 0.884                |
| C <sub>5</sub> N               | 3.534   | 1.356   | 1.541         | 1.194                |
| C <sub>4</sub> N <sub>2</sub>  | 3.415   | 1.509   | 1.514         | 1.485                |
| C <sub>2</sub> N <sub>4</sub>  | 3.313   | 1.529   | 1.468         | 0.610                |
| CN <sub>5</sub>                | 3.250   | 1.814   | 1.430         | 1.375                |
| C <sub>5</sub> Al              | 4.063   | 1.353   | 1.921         | 1.298                |
| C <sub>4</sub> Al <sub>2</sub> | 4.668   | 1.444   | 2.061         | 0.743                |
| C <sub>2</sub> Al <sub>4</sub> | 5.110   | 1.189   | 1.975         | 0.595                |
| CAI <sub>5</sub>               | 5.648   | 1.491   | 1.961         | 0.792                |
| C <sub>5</sub> Si              | 4.022   | 1.272   | 1.817         | 0.988                |
| C <sub>4</sub> Si <sub>2</sub> | 4.409   | 1.326   | 1.908         | 0.605                |
| C <sub>2</sub> Si <sub>4</sub> | 4.217   | 2.253   | 1.883         | 0.741                |
| CSi <sub>5</sub>               | 4.727   | 2.401   | 1.904         | 0.719                |
| C <sub>5</sub> P               | 3.891   | 1.331   | 1.758         | 0.925                |
| C <sub>4</sub> P <sub>2</sub>  | 4.141   | 1.409   | 1.794         | 0.672                |
| C <sub>2</sub> P <sub>4</sub>  | 4.092   | 2.319   | 1.879         | 0.174                |
| CP <sub>5</sub>                | 4.479   | 2.622   | 1.948         | 0.229                |
| C <sub>5</sub> Ga              | 4.096   | 1.349   | 1.929         | 1.458                |
| C <sub>4</sub> Ga <sub>2</sub> | 4.721   | 1.434   | 2.086         | 0.952                |
| C <sub>2</sub> Ga <sub>4</sub> | 5.010   | 1.568   | 2.010         | 0.797                |
| CGa <sub>5</sub>               | 5.570   | 1.634   | 2.005         | 0.654                |
| C <sub>5</sub> Ge              | 4.105   | 1.294   | 1.877         | 1.257                |
| C <sub>4</sub> Ge <sub>2</sub> | 4.575   | 1.365   | 1.993         | 0.915                |
| C <sub>2</sub> Ge <sub>4</sub> | 4.575   | 2.337   | 2.012         | 0.854                |
| CGe <sub>5</sub>               | 5.098   | 2.518   | 2.003         | 0.728                |
| C <sub>5</sub> As              | 4.024   | 1.386   | 1.869         | 1.339                |
| C <sub>4</sub> As <sub>2</sub> | 4.423   | 1.520   | 1.944         | 1.280                |
| C <sub>2</sub> As <sub>4</sub> | 4.362   | 2.541   | 2.015         | 0.522                |
| CAs <sub>5</sub>               | 4.730   | 2.891   | 2.043         | 0.535                |

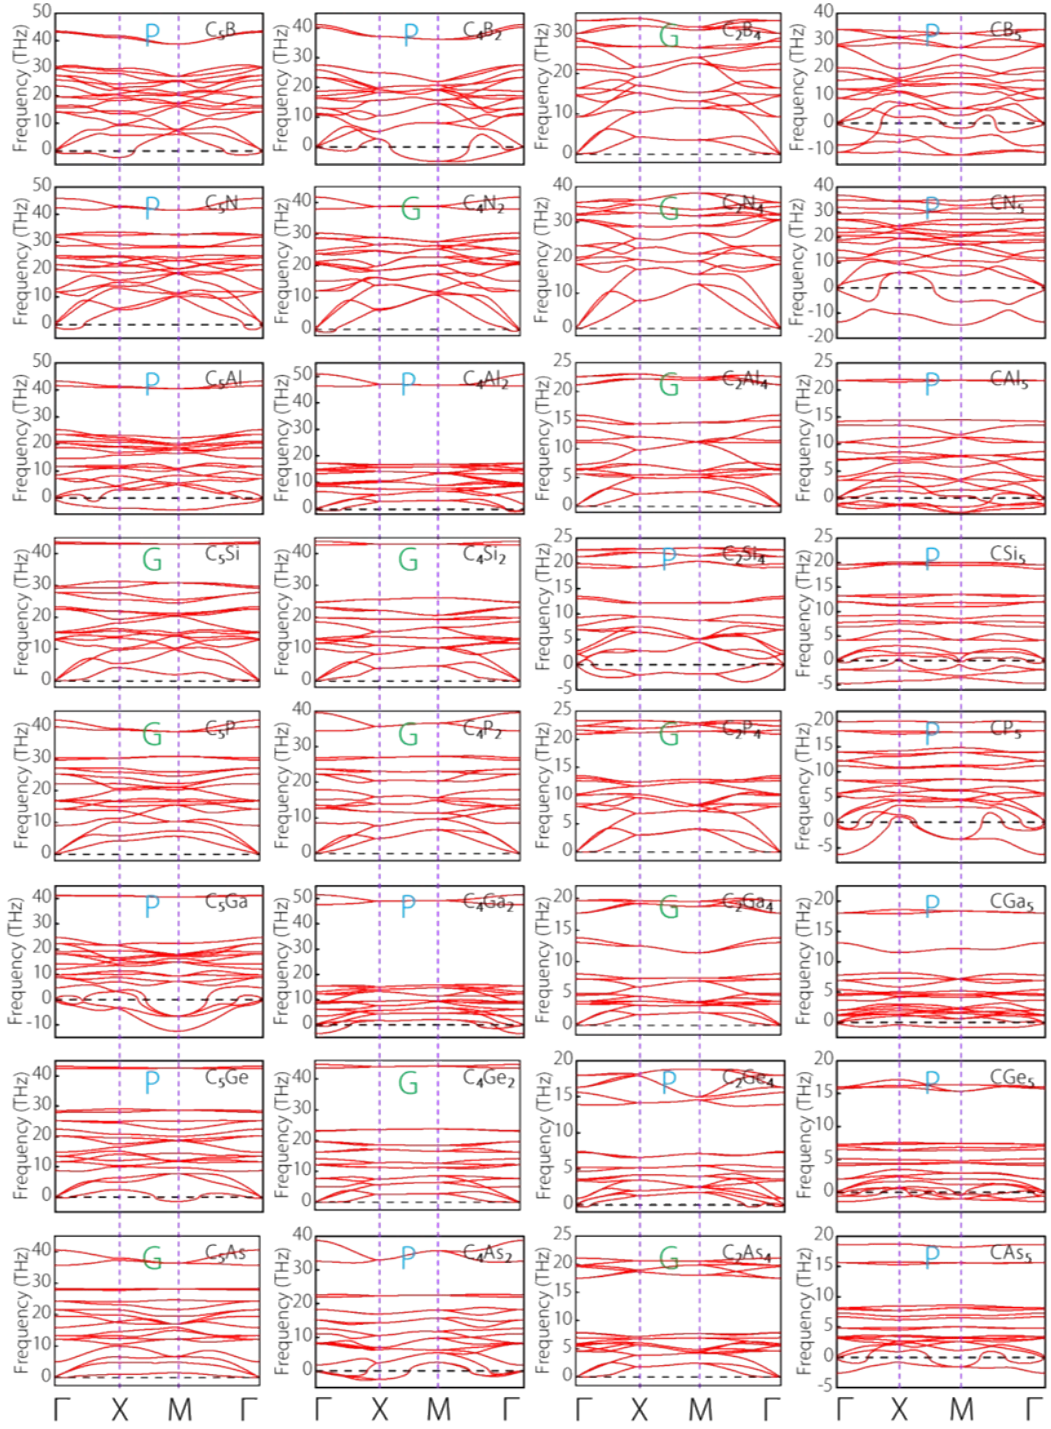

Figure S1 Phonon spectra of Penta- $C_nX_{6-n}$ . G (green) and P (blue) represent the good and poor dynamic stability, respectively. The dashed line indicates zero frequency, below which the structure is dynamically unstable.

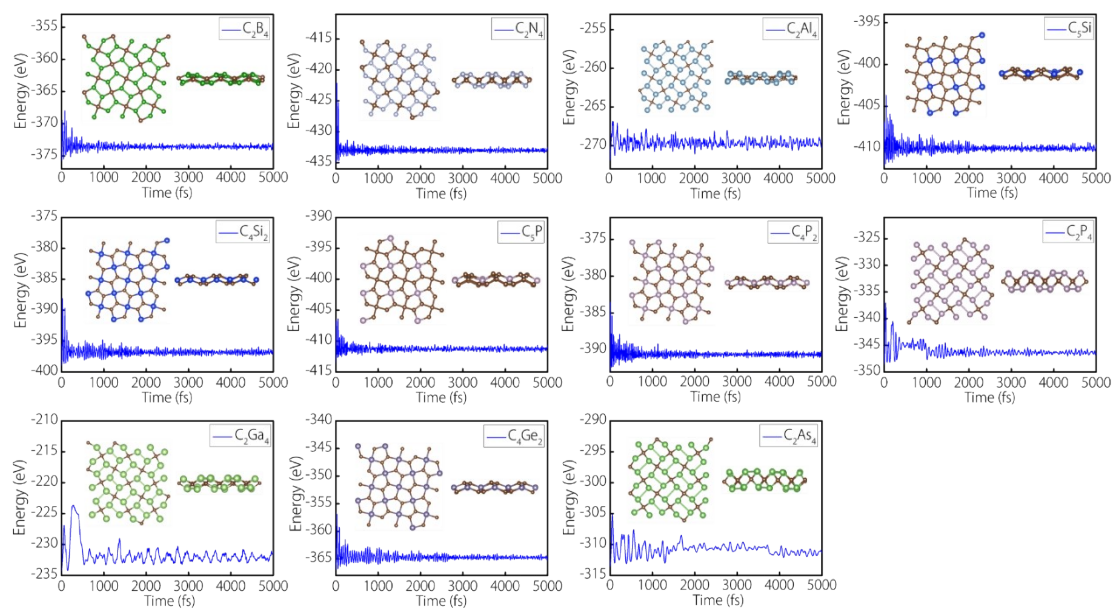

Figure S2 Evolutions of total potential energy of Penta-C<sub>n</sub>X<sub>6-n</sub> with respect to simulation time at the temperature of 300 K, and the top and side views of snapshots after 5000 fs.

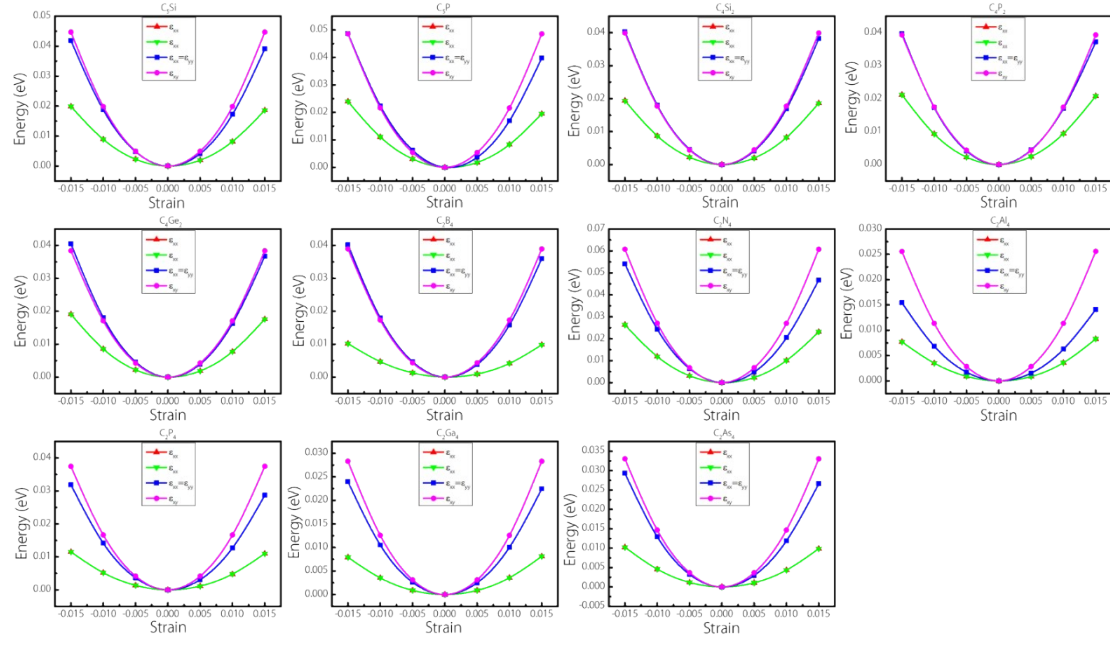

Figure S3 Elastic energies of Penta- $C_nX_{6-n}$  under uniaxial, biaxial and shear in-plane strains, respectively.



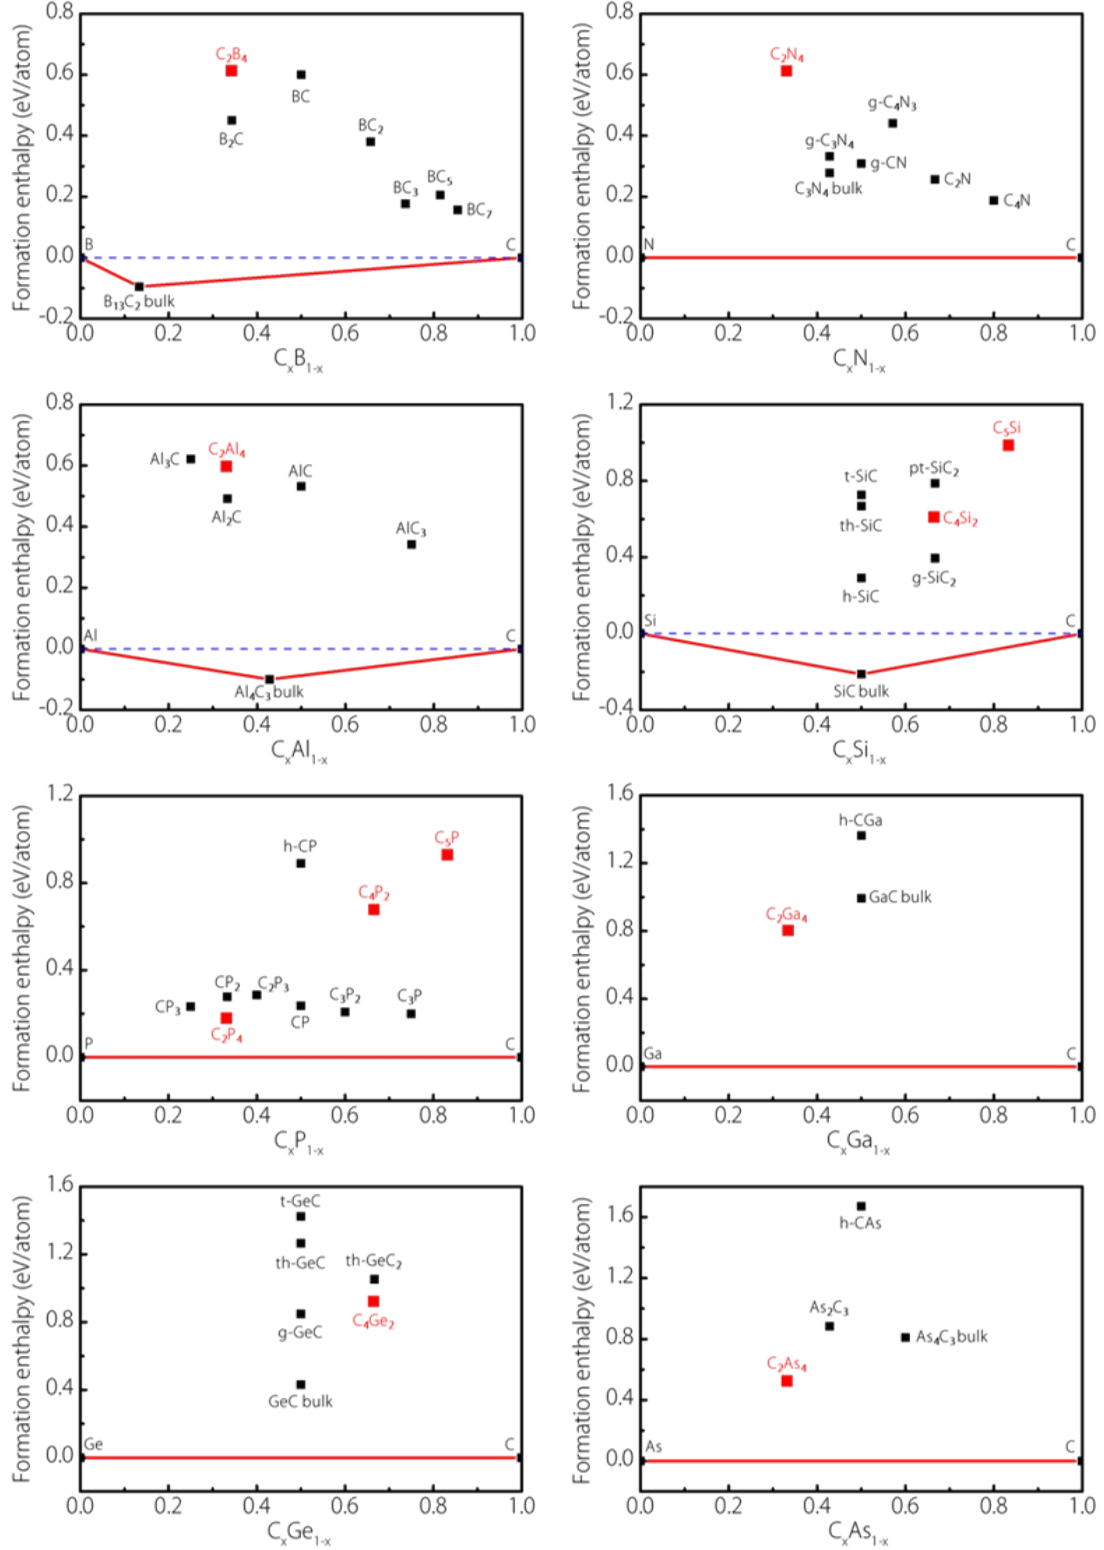

Figure S4 Formation enthalpies of stable Penta- $C_nX_{6-n}$  compared with their allotropes in other works. Therein, the red marks are our Penta- $C_nX_{6-n}$  and the black ones are others. References are as follows:  $B_{13}C_2$  bulk,  $C_3N_4$  bulk,  $Al_4C_3$  bulk,  $GaC$  bulk,  $As_4C_3$  bulk [6];  $B_2C$ ,  $BC$ ,  $BC_2$ ,  $BC_3$ ,  $BC_5$ ,  $BC_7$  [7-11];  $g-C_3N_4$ ,  $g-CN$ ,  $g-C_4N_3$ ,  $C_2N$ ,  $C_4N$  [12-16];  $Al_3C$ ,  $Al_2C$ ,  $AlC$ ,  $AlC_3$  [17];  $h-SiC$ ,  $th-SiC$ ,  $t-SiC$ ,  $g-SiC_2$ ,  $pt-SiC_2$  [18-20];  $CP_3$ ,

CP<sub>2</sub>, C<sub>2</sub>P<sub>3</sub>, CP, h-CP, C<sub>3</sub>P<sub>2</sub>, C<sub>3</sub>P [21-23]; h-CGa [23]; g-GeC, th-GeC, t-GeC, th-GeC<sub>2</sub> [18,24,25]; h-CAs, As<sub>2</sub>C<sub>3</sub> [23,26].

[6] A. Jain, S.P. Ong, G. Hautier, W. Chen, W.D. Richards, S. Dacek, et al., Commentary: The Materials Project: A materials genome approach to accelerating materials innovation, *APL Mater.* 1 (2013) 011002.

APL Materials, 2013, 1(1), 011002.

[7] X.J. Wu, Y. Pei, X.C. Zeng, B<sub>2</sub>C graphene, nanotubes, and nanoribbons, *Nano Lett.* 9 (2009) 1577-1582.

[8] D. Das, R.P. Hardikar, S.S. Han, K.R. Lee, A.K. Singh, Monolayer BC<sub>2</sub>: an ultrahigh capacity anode material for Li ion batteries, *Phys. Chem. Chem. Phys.* 19 (2017) 24230-24239.

[9] C. Oshima, BC<sub>x</sub> layers with honeycomb lattices on an NbB<sub>2</sub> (0001) surface, *J. Phys. Condens. Matter* 24 (2012) 314206.

[10] B.M. Way, J.R. Dahn, T. Tiedje, K. Myrtle, M. Kasrai, Preparation and characterization of B<sub>x</sub>C<sub>1-x</sub> thin films with the graphite structure, *Phys. Rev. B* 46 (1992) 1697.

[11] K. Belasfar, A.E. Kenz, A. Benyoussef, First-principles study of BC<sub>7</sub> monolayer an ultra-high capacity anode for lithium-ion and sodium-ion batteries applications, *Mater. Chem. Phys.* 257 (2021) 123751.

[12] X.C. Wang, K. Maeda, A. Thomas, K. Takanabe, G. Xin, K. Domen, M. Antonietti, A metal-free polymeric photocatalyst for hydrogen production from water under visible light, *Nat. Mater.* 8 (2009) 76-82.

[13] J. Li, C.B. Cao, J.W. Hao, H.L. Qiu, Y.J. Xu, H.S. Zhu, Self-Assembled One-Dimensional Carbon Nitride Architectures, *Diamond Relat. Mater.* 2006, 15, 1593-1600.

[14] J.S. Lee, X.Q. Wang, H.M. Luo, S. Dai, Fluidic carbon precursors for formation of functional carbon under ambient pressure based on ionic liquids, *Adv. Mater.* 22 (2010) 1004-1007.

[15] S. Guan, Y.C. Cheng, C. Liu, J.F. Han, Y.H. Lu, S.A. Yang, et al., Effects of strain

on electronic and optic properties of holey two-dimensional  $C_2N$  crystals, *Appl. Phys. Lett.* 107 (2015) 231904.

[16] C.Y. Pu, D.W. Zhou, Y.F. Li, H.Y. Liu, Z.F. Chen, Y.C. Wang, et al., Two-dimensional  $C_4N$  global minima: unique structural topologies and nanoelectronic properties, *J. Phys. Chem. C* 121 (2017) 2669-2674.

[17] J. Dai, X.J. Wu, J.L. Yang, X.C. Zeng,  $Al_xC$  monolayer sheets: two-dimensional networks with planar tetracoordinate carbon and potential applications as donor materials in solar cell, *J. Phys. Chem. Lett.* 5 (2014) 2058-2065.

[18] M.E. Kilic, K.R. Lee, Tetrahex carbides: Two-dimensional group-IV materials for nanoelectronics and photocatalytic water splitting, *Carbon*, 174 (2021) 368-381.

[19] L.J. Zhou, Y.F. Zhang, L.M. Wu,  $SiC_2$  siligraphene and nanotubes: novel donor materials in excitonic solar cells, *Nano Lett.* 13 (2013) 5431-5436.

[20] Y.F. Li, F.Y. Li, Z. Zhou, Z.F. Chen,  $SiC_2$  silagraphene and its one-dimensional derivatives: where planar tetracoordinate silicon happens, *J. Am. Chem. Soc.* 133 (2011) 900-908.

[21] M. Kar, R. Sarkar, S. Pal, P. Sarkar, Two-dimensional  $CP_3$  monolayer and its fluorinated derivative with promising electronic and optical properties: A theoretical study, *Phys. Rev. B* 10 (2020) 195305.

[22] G.X. Wang, R. Pandey, S.P. Karna, Carbon phosphide monolayers with superior carrier mobility, *Nanoscale*, 8 (2016) 8819-8825.

[23] S. Kansara, S.K. Gupta, Y. Sonvane, Boltzmann transport properties of ultra thin-layer of h-CX monolayers. *AIP Conf. Proc.* 1951 (2018) 020007.

[24] N. Khossossi, A. Banerjee, I. Essaoudi, A. Ainane, P. Jena, R. Ahuja, Thermodynamics and kinetics of 2D g-GeC monolayer as an anode material for Li/Na-ion batteries. *J. Power Sources*, 485 (2021) 229318.

[25] W. Zhang, C.C. Chai, Q.Y. Fan, M.L. Sun, Y.X. Song, Y.T. Yang, et al., Two-Dimensional Tetrahex- $GeC_2$ : A Material with Tunable Electronic and Optical Properties Combined with Ultrahigh Carrier Mobility, *ACS Appl. Mater. Interfaces* 13 (2021) 14489-14496.

[26] P.F. Liu, T. Bo, Z.F. Liu, O. Eriksson, F.W. Wang, J.J. Zhao, et al., Hexagonal  $M_2C_3$  ( $M = As, Sb, \text{ and } Bi$ ) monolayers: New functional materials with desirable band gaps and ultrahigh carrier mobility, *J. Mater. Chem. C* 6 (2018) 12689-12697.

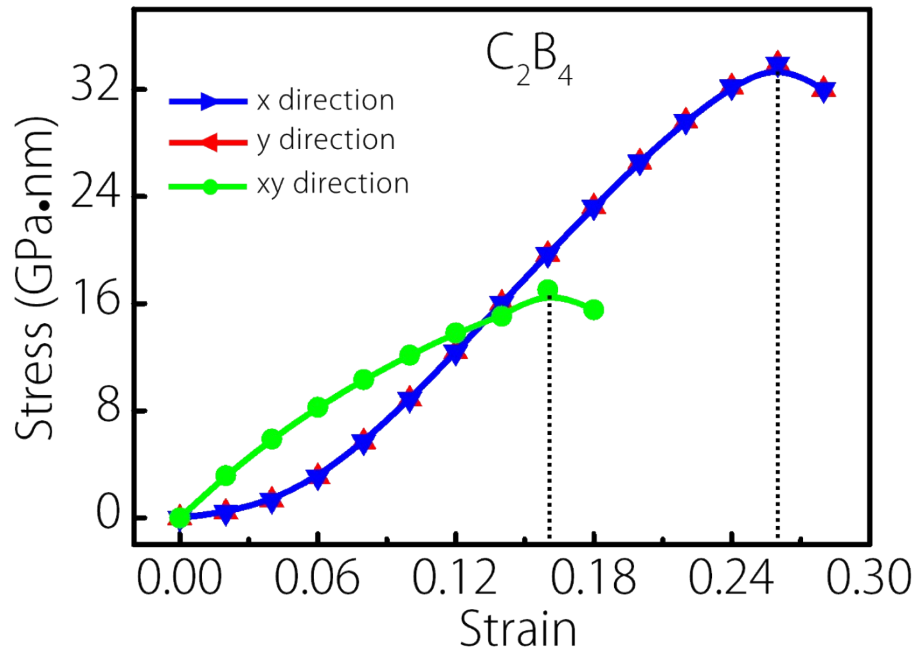

Figure S5 Stress-strain relationships of uniaxial ( $x$  and  $y$  directions) and biaxial ( $xy$  direction) in-plane strains for Penta- $C_2B_4$ .

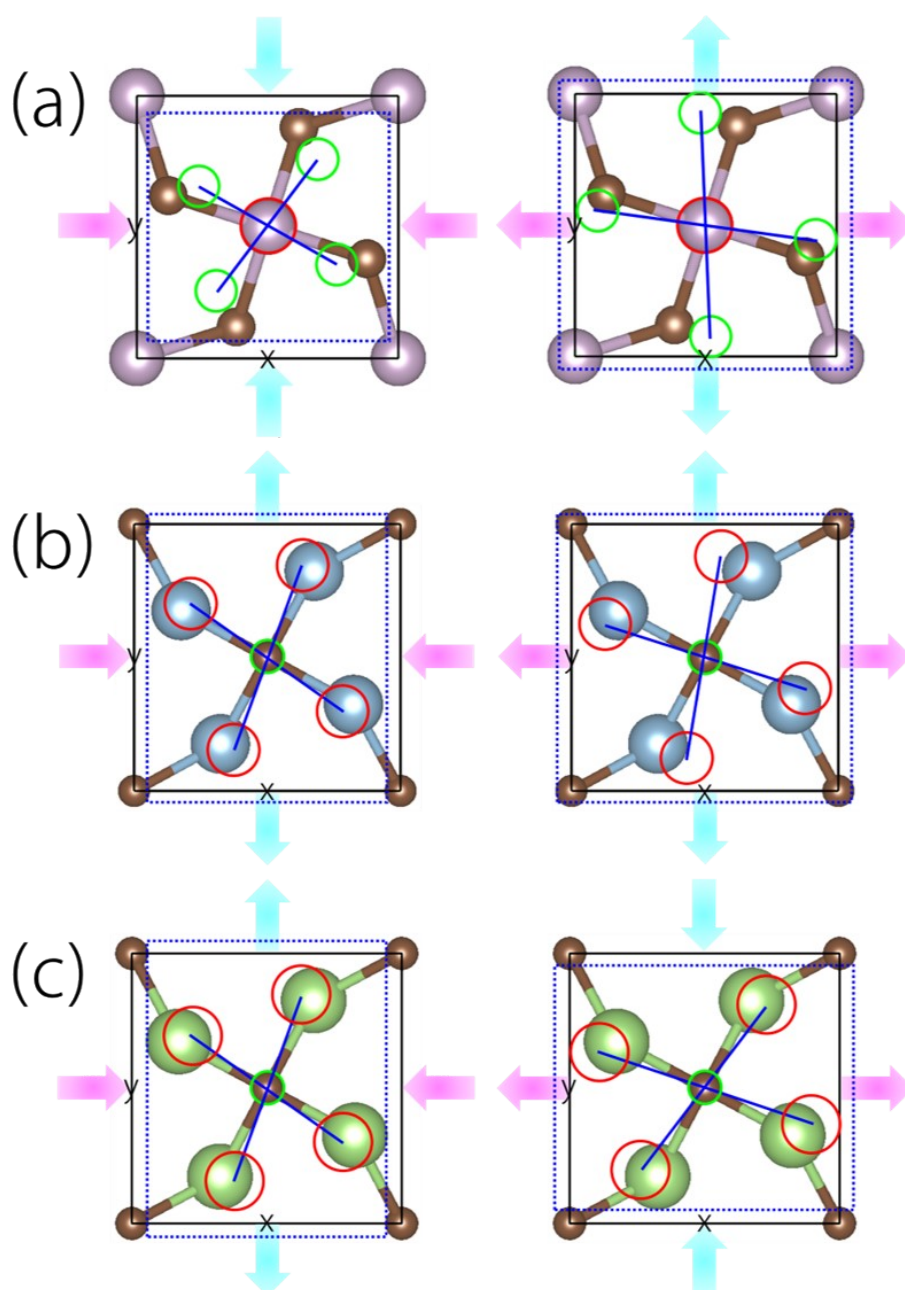

Figure S6 Evolutions of the local skeleton configurations of (a) Penta- $C_4P_2$  (NPR), (b) Penta- $C_2Al_4$  (H-NPR) and (c) Penta- $C_2Ga_4$  (PRR) under the uniaxial strain along  $x$  direction. The pink and cyan arrows indicate the applied and driven uniaxial strains.

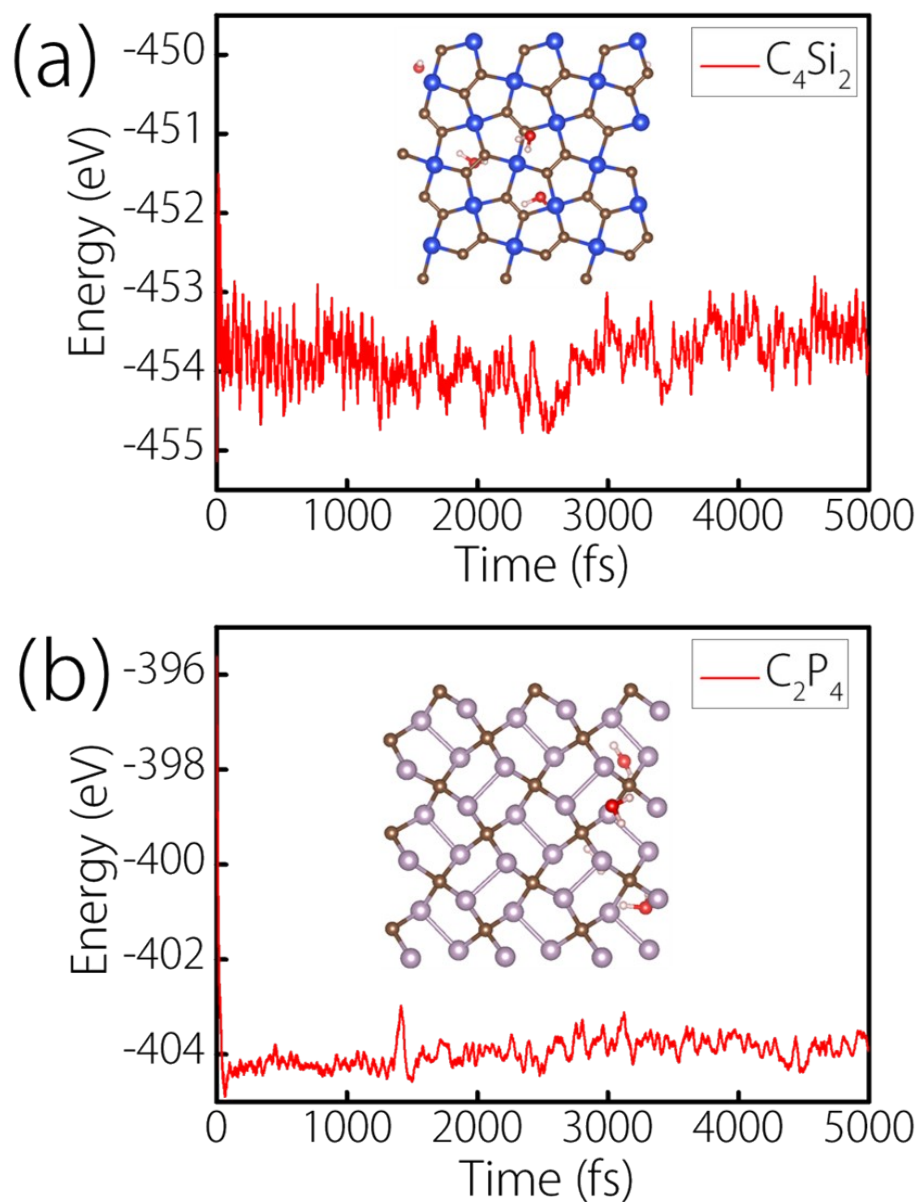

Figure S7 Evolution of the total energy of Penta-C<sub>4</sub>Si<sub>2</sub> and Penta-C<sub>2</sub>P<sub>4</sub> (3×3 supercells) obtained from 5000 fs AIMD simulations in a 300 K water environment. And the final configuration at t = 5000 fs is shown in the inset for comparison.

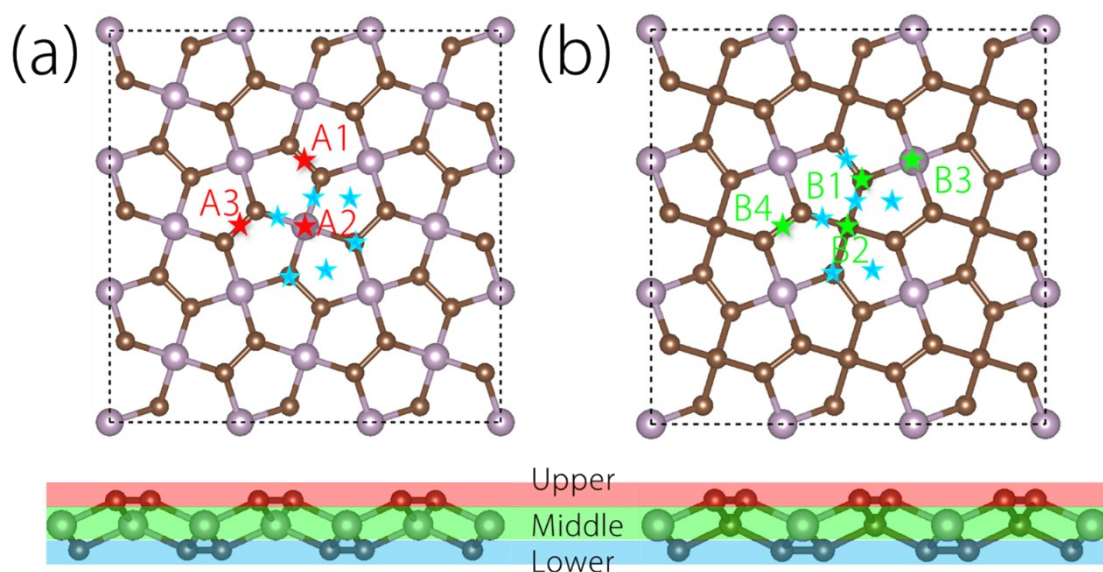

Figure S8 Possible adsorption sites on (a) Penta-C<sub>4</sub>P<sub>2</sub> and (b) Penta-C<sub>5</sub>P. Therein, A1 (on the bridge site of the lower C atoms), A2 (on the top site of the P atoms) and A3 (on the bridge site of the upper C atoms) are stable adsorption sites for Penta-C<sub>4</sub>P<sub>2</sub>; B1 (on the top site of the lower C atoms), B2 (on the top site of the middle C atoms), B3 (on the top site of the P atoms) and B4 (on the bridge site of the upper C atoms) are stable adsorption sites for Penta-C<sub>5</sub>P. The blue stars represent the unstable adsorption sites (the Na atoms at these sites would move to the stable sites after structural optimization).
